# Supplementary material for: Synthesizing Complex-Valued Multicoil MRI Data from Magnitude-Only Images
Source: MDPI journal article supplement (doi:10.3390/bioengineering10030358), 2023-03-14
Supplement: s1 [file s1]

# Synthesizing Complex-Valued Multicoil MRI Data from Magnitude-only Images

Nikhil Deveshwar <sup>1,2,3</sup> , Abhejit Rajagopal <sup>2</sup>, Sule Sahin <sup>1,2</sup>, Efrat Shimron <sup>3</sup> and Peder E. Z. Larson <sup>1,2\*</sup>

<sup>1</sup> UC Berkeley-UCSF Graduate Program in Bioengineering, Berkeley and San Francisco, CA, USA

<sup>2</sup> Department of Radiology and Biomedical Imaging, University of California San Francisco, San Francisco, CA, USA, USA

<sup>3</sup> Department of Electrical Engineering and Computer Sciences, University of California, Berkeley, Berkeley, CA

\* Correspondence: peder.larson@ucsf.edu

**Table S1.** PSNR values for VarNet trained on different types of phase at various acceleration factors for the 16-coil dataset. Bold values indicate the best performing type of phase (not including ground truth).

| Phase type             | R=4           | R=6           | R=8           | R=10          |
|------------------------|---------------|---------------|---------------|---------------|
| Ground truth           | 32.915        | 29.995        | 28.4529       | 27.692        |
| Synthetic Phase (ours) | <b>31.196</b> | <b>28.602</b> | <b>28.039</b> | <b>26.378</b> |
| Sinusoidal Phase       | 23.652        | 23.229        | 22.99         | 22.590        |
| Random Phase           | 23.938        | 22.255        | 22.028        | 22.581        |
| Zero Phase             | 23.911        | 23.589        | 22.976        | 21.518        |

**Table S2.** PSNR values for VarNet trained on different types of phase at various acceleration factors for the 20-coil dataset. Bold values indicate the best performing type of phase (not including ground truth).

| Phase Type            | R=4           | R=6           | R=8           | R=10          |
|-----------------------|---------------|---------------|---------------|---------------|
| Ground Truth          | 32.605        | 30.0454       | 28.367        | 27.747        |
| Synthetic Phase(ours) | <b>30.484</b> | <b>29.712</b> | <b>27.054</b> | <b>26.314</b> |
| Sinusoidal Phase      | 23.068        | 22.576        | 22.255        | 22.020        |
| Random Phase          | 22.994        | 22.771        | 22.434        | 22.066        |
| Zero Phase            | 2.947         | 22.74         | 22.388        | 21.826        |

**Table S3.** NMSE values for VarNet trained on different types of phase at various acceleration factors for the 16-coil dataset. Bold values indicate the best performing type of phase (not including ground truth).

| Phase Type             | R=4           | R=6           | R=8           | R=10         |
|------------------------|---------------|---------------|---------------|--------------|
| Ground Truth           | 0.0133        | 0.0213        | 0.029295      | 0.03615      |
| Synthetic Phase (ours) | <b>0.0195</b> | <b>0.0309</b> | <b>0.0336</b> | <b>0.043</b> |
| Sinusoidal Phase       | 0.096         | 0.099         | 0.108         | 0.115        |
| Random Phase           | 0.093         | 0.102         | 0.103         | 0.116        |
| Zero Phase             | 0.092         | 0.101         | 0.107         | 0.152        |

**Table S4.** NMSE values for VarNet trained on different types of phase at various acceleration factors for the 20-coil dataset. Bold values indicate the best performing type of phase (not including ground truth).

| Phase Type             | R=4           | R=6           | R=8           | R=10          |
|------------------------|---------------|---------------|---------------|---------------|
| Ground Truth           | 0.0176        | 0.0244        | 0.0354        | 0.0383        |
| Synthetic Phase (ours) | <b>0.0265</b> | <b>0.0337</b> | <b>0.0520</b> | <b>0.0613</b> |
| Sinusoidal Phase       | 0.249         | 0.253         | 0.263         | 0.304         |
| Random Phase           | 0.247         | 0.2409        | 0.251         | 0.284         |
| Zero Phase             | 0.266         | 0.230         | 0.243         | 0.301         |

**Table S5.** SSIM values for VarNet trained on different types of phase at various acceleration factors for the 16-coil dataset. Bold values indicate the best performing type of phase (not including ground truth).

| Phase Type             | R=4          | R=6          | R=8          | R=10         |
|------------------------|--------------|--------------|--------------|--------------|
| Ground Truth           | 0.8425       | 0.816        | 0.773        | 0.767        |
| Synthetic Phase (ours) | 0.7468       | <b>0.745</b> | 0.6889       | 0.6511       |
| Sinusoidal Phase       | <b>0.768</b> | 0.736        | <b>0.721</b> | <b>0.694</b> |
| Random Phase           | 0.668        | 0.639        | 0.618        | 0.598        |
| Zero Phase             | 0.668        | 0.645        | 0.617        | 0.546        |

**Table S6.** SSIM values for VarNet trained on different types of phase at various acceleration factors for the 20-coil dataset. Bold values indicate the best performing type of phase (not including ground truth).

| Phase Type             | R=4          | R=6          | R=8          | R=10         |
|------------------------|--------------|--------------|--------------|--------------|
| Ground Truth           | 0.8189       | 0.790        | 0.731        | 0.722        |
| Synthetic Phase (ours) | <b>0.819</b> | <b>0.784</b> | <b>0.681</b> | <b>0.671</b> |
| Sinusoidal Phase       | 0.701        | 0.687        | 0.674        | 0.655        |
| Random Phase           | 0.708        | 0.687        | 0.669        | 0.652        |
| Zero Phase             | 0.709        | 0.691        | 0.672        | 0.644        |
